# Supplementary material
Source: PubMed Central journal article supplement (PMC3934722)
Supplement: supp_M038786_jlr.M038786-1.pdf [file supp_M038786_jlr.M038786-1.pdf]

## SUPPLEMENTAL INFORMATION

**Supplemental Table S1. Primers for quantitative real-time PCR.**

**Supplemental Table S2. Primary antibodies used in this study.**

**Supplemental Table S3. Effects of dietary quercetin on the body weight gain, liver weight and adipose tissue weight in C57BL/6 mice.**

**Supplemental Figure S1. Effect of quercetin on ACC phosphorylation and *Cpt1a* expression in BMDMs.**

**Supplemental Figure S2. Effect of quercetin on GLUT4 translocation in 3T3-L1 adipocytes.**

**Supplemental Figure S3. Mechanism of quercetin anti-inflammatory effects in adipose tissue macrophages.**

## SUPPLEMENTAL INFORMATION

**Table S1. Primers for quantitative real-time PCR**

| Gene                           | Sequence of forward primers (5' to 3') | Sequence of reverse primers (5' to 3') |
|--------------------------------|----------------------------------------|----------------------------------------|
| <i>F4/80</i>                   | CTTTGGCTATGGGCTTCCAGTC                 | GCAAGGAGGACAGAGTTTATCGTG               |
| <i>mMcp-4</i>                  | CTTCTGACTTTTATCAAGCCGGG                | CACTCCAGTTCGCCCCC                      |
| <i>Cd11c</i>                   | CTGGATAGCCTTTCTTCTGCTG                 | GCACACTGTGTCCGAACTC                    |
| <i>Nos2</i>                    | CCAAGCCCTCACCTACTTCC                   | CTCTGAGGGCTGACACAAGG                   |
| <i>Chi3l3</i>                  | AGAAGGGAGTTTCAAACCTGGT                 | GTCTTGCTCATGTGTGTAAGTGA                |
| <i>Mgl2</i>                    | TTAGCCAATGTGCTTAGCTGG                  | GGCCTCCAATTCTTCTTGAAACCT               |
| <i>Adiponectin</i>             | GCAGAGATGGCACTCCTGGA                   | CCCTTCAGCTCCTGTCATTCC                  |
| <i>GLUT4</i>                   | GTGACTGGAACACTGGTCCTA                  | CCAGCCACGTTGCATTGTAG                   |
| <i>Mcp-1</i>                   | CCCCAAGAAGGAATGGGTCC                   | GGTTGTGGAAAAGGTAGTGG                   |
| <i>IL-6</i>                    | CCTTCCTACCCCAATTTCCAA                  | AGATGAATTGGATGGTCTTGGTC                |
| <i>Tnf-<math>\alpha</math></i> | ACGGCATGGATCTCAAAGAC                   | AGATAGCAAATCGGCTGACG                   |
| <i>IL-1<math>\beta</math></i>  | GCAACTGTTCTGAACTCAACT                  | TCTTTTGGGGTCCGTCAACT                   |
| <i>IL-10</i>                   | ACTGCACCCACTTCCCAGT                    | TGTCCAGCTGGTCCTTTGTT                   |
| <i>Cpt1a</i>                   | CTATGCGCTACTCGCTGAAGG                  | GGCTTTGACCCGAGAAGA                     |
| <i>Ucp1</i>                    | CACTCAGGATTGGCCTCTACG                  | GGGGTTTGATCCCATGCAGA                   |
| <i>GAPDH</i>                   | TGTCATACTTGGCAGTTTCT                   | CGTGTTCTACCCCAATGT                     |

**Table S2. Primary antibodies used in this study**

| Antibody name                                      | Supplier                  | Catalog No. | Dilution |
|----------------------------------------------------|---------------------------|-------------|----------|
| AKT rabbit mAb                                     | Cell Signaling Technology | 4691        | 1:1000   |
| Phospho-AKT (Ser473) antibody                      | Cell Signaling Technology | 9271        | 1:1000   |
| AMPK $\alpha$ antibody                             | Cell Signaling Technology | 2532        | 1:1000   |
| Phospho-AMPK $\alpha$ (Thr172) antibody            | Cell Signaling Technology | 2531        | 1:1000   |
| SIRT1 rabbit mAb                                   | Cell Signaling Technology | 9475        | 1:1000   |
| Acetyl-CoA Carboxylase rabbit mAb                  | Cell Signaling Technology | 3676        | 1:1000   |
| Phospho-Acetyl-CoA Carboxylase (Ser79)<br>antibody | Cell Signaling Technology | 3661        | 1:1000   |
| LKB1 rabbit mAb                                    | Cell Signaling Technology | 3047        | 1:1000   |
| Phospho-LKB1 (Ser428) rabbit mAb                   | Cell Signaling Technology | 3482        | 1:1000   |
| Anti-GLUT-4 polyclonal antibody                    | Millipore                 | 07-1404     | 1:500    |
| Anti-Actin                                         | Sigma-Aldrich             | A2066       | 1:100    |
| Purified anti-mouse Mac-2                          | Biolegend                 | 125401      | 1:800    |

**Table S3. Effects of dietary quercetin on the body weight gain, liver weight and adipose tissue weight in C57BL/6 mice.**

|                         | HFD                       | HFD+0.1%Qu                | LFD                       |
|-------------------------|---------------------------|---------------------------|---------------------------|
| Initial body weight (g) | 19.660±0.252 <sup>a</sup> | 19.588±0.472 <sup>a</sup> | 19.300±0.407 <sup>a</sup> |
| Final body weight (g)   | 41.320±0.950 <sup>a</sup> | 37.244±1.455 <sup>b</sup> | 30.455±0.592 <sup>c</sup> |
| Liver weight (g)        | 1.359±0.060 <sup>a</sup>  | 1.341±0.079 <sup>a</sup>  | 1.494±0.068 <sup>a</sup>  |
| EAT weight (g)          | 1.861±0.061 <sup>a</sup>  | 1.302±0.175 <sup>b</sup>  | 0.361±0.063 <sup>c</sup>  |
| SAT weight (g)          | 1.335±0.109 <sup>a</sup>  | 0.783±0.121 <sup>b</sup>  | 0.263±0.029 <sup>c</sup>  |
| BAT weight (g)          | 0.168±0.015 <sup>a</sup>  | 0.18±0.028 <sup>a</sup>   | 0.082±0.005 <sup>b</sup>  |

Values are mean ± SEM, n=8. Values within a row with different superscript letters in each experiment are significantly different from each other (p<0.05) by Mann-Whitney test. LFD, low fat diet; HFD, high fat diet; HFD+0.1%Qu, high fat diet containing 0.1% quercetin; EAT, epididymal adipose tissue; SAT, subcutaneous adipose tissue; BAT, brown adipose tissue.

**A**

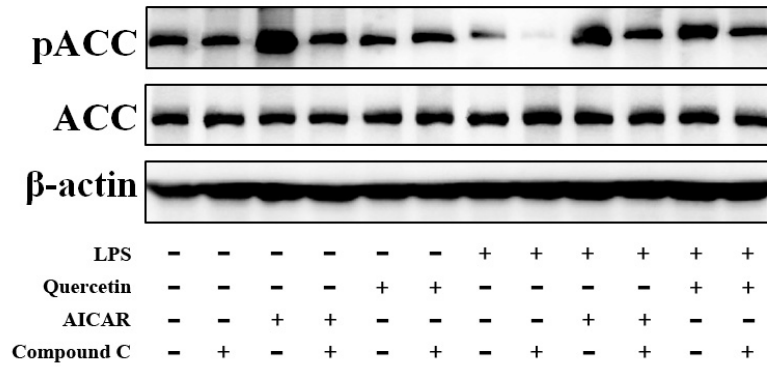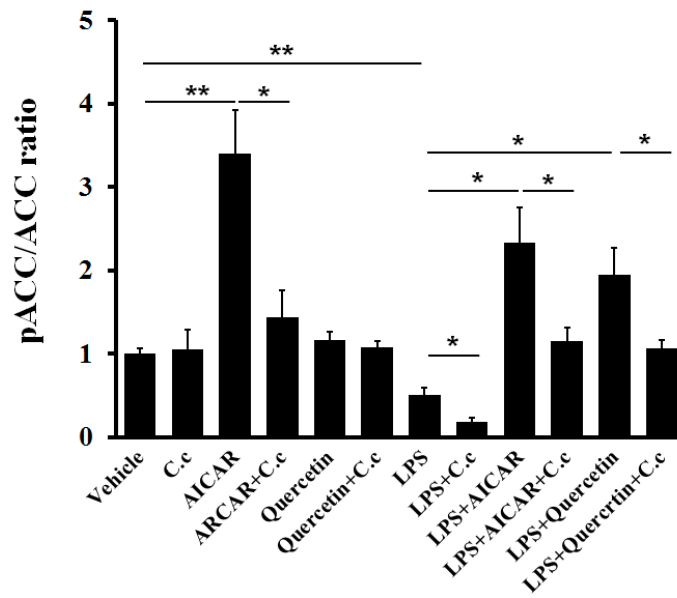

**B**

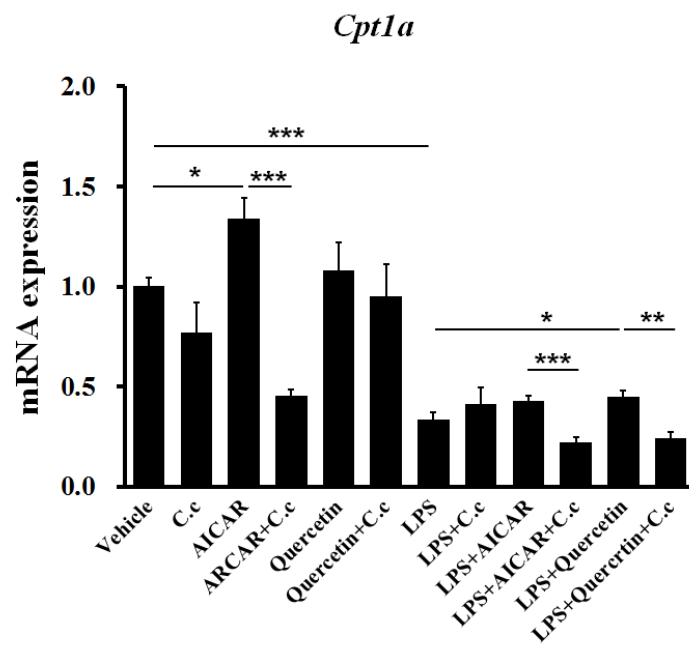

**Supplemental Figure S1. Effect of quercetin on ACC phosphorylation and *Cpt1a* expression in BMDMs.** (A) Immunoblots for phospho-ACC (Ser 79) and ACC in BMDMs. Quantification of protein expression was described as ratio of phosphorylated ACC to total ACC. (B) Real-time PCR quantitative mRNA expression of *Cpt1a* in BMDMs. *GAPDH* was used as reference gene in qPCR analysis. Data are represented as fold changes compared to vehicle. C.c represented Compound C. Statistical difference between groups was shown using a Student's t test. n=4 per group. \*p<0.05, \*\*p<0.01, \*\*\*p<0.001. All data are mean  $\pm$  SEM.

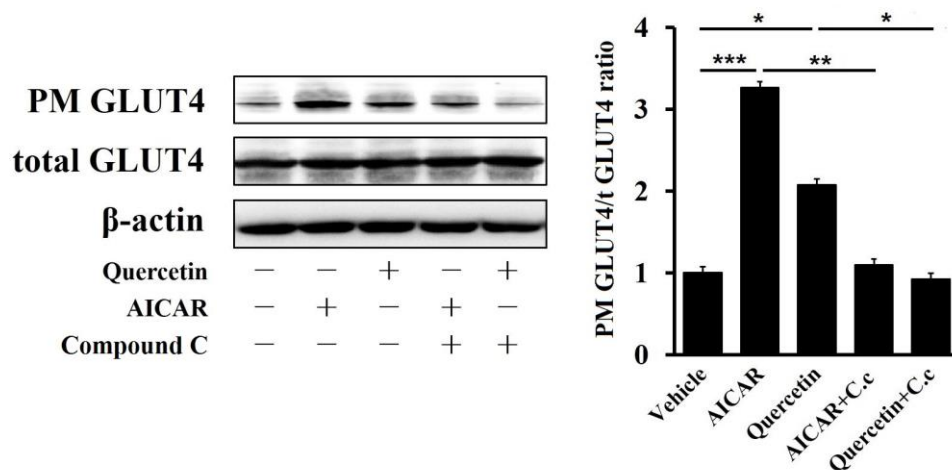

**Supplemental Figure S2. Effect of quercetin on GLUT4 translocation in 3T3-L1 adipocytes.** Differentiated 3T3-L1 adipocytes were starved for 2 h in serum-free medium before starting the experiment. Thereafter, 2 mM AICAR or 20  $\mu$ M quercetin were added into medium with or without 10  $\mu$ M Compound C for 30 min. Quantification of protein expression was described as ratio of plasma membrane protein to total protein. Data are represented as fold changes compared to vehicle. C.c represented Compound C. Statistical difference between groups was shown using a Student's t test. n=4 per group. \*p<0.05, \*\*p<0.01, \*\*\*p<0.001. All data are mean  $\pm$  SEM.

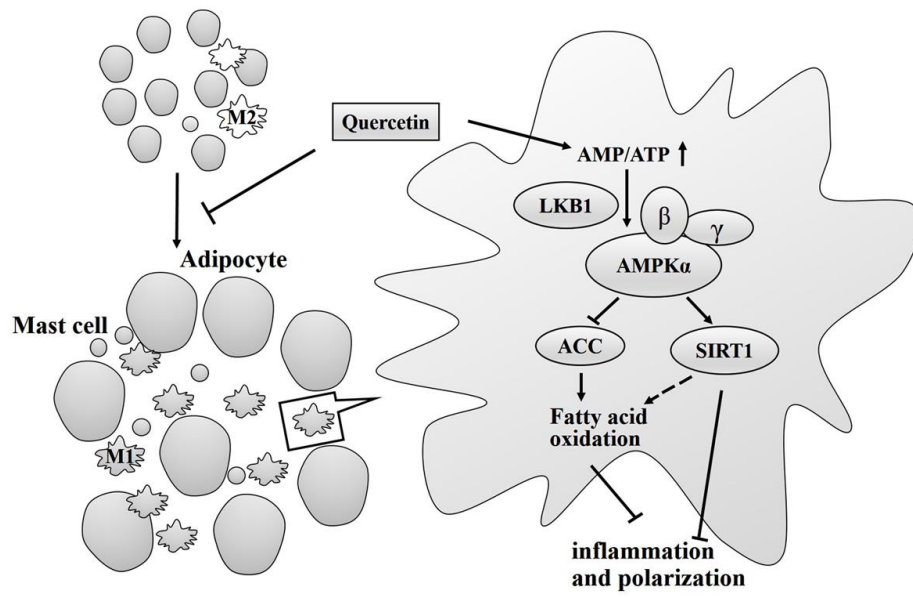

**Supplemental Figure S3. Mechanism of quercetin anti-inflammatory effects in adipose tissue macrophages.**
